# Supplementary material for: Res-CN (Reservoir dataset in China): hydrometeorological time series and landscape attributes across 3254 Chinese reservoirs
Source: Copernicus journal article supplement (doi:10.5194/essd-15-2781-2023), 2023-07-05
Supplement: Supplementary file 1 [file essd-15-2781-2023-supplement.pdf]

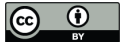

*Supplement of*

## **Res-CN (Reservoir dataset in China): hydrometeorological time series and landscape attributes across 3254 Chinese reservoirs**

**Youjiang Shen et al.**

*Correspondence to:* Youjiang Shen ([yjshen2022@rainbow.iis.u-tokyo.ac.jp](mailto:yjshen2022@rainbow.iis.u-tokyo.ac.jp))

The copyright of individual parts of the supplement might differ from the article licence.

1 **Contents of this file**

- 2 • Figs. S1-3 shows the methodologies of generate reservoir water level, storage anomaly and evaporation,  
3 respectively.
- 4 • Fig. S4 describes the distribution of reservoir water surface area values and Top 20 reservoirs based on  
5 area size in our data product.
- 6 • Figure S5 shows the cross validation of the areas of delineated catchments in this study.
- 7 • Figure S6 represents the performances of altimetry-derived water level from each satellite altimeters with  
8 different retracking algorithms.
- 9 • Fig. S7 illustrates the comparison between our water level time series and other existing similar databases.
- 10 • Fig. S8 shows the uncertainties for each value in the time series of reservoir water level at some selected  
11 reservoirs.
- 12 • Figure S9 shows the performance of the Standard-rate (SR) and High-rate (HR) products in terms of the  
13 RMSE and the relative RMSE values of the validated reservoirs. For detailed validation metrics, please refer  
14 to our data.
- 15 • Figure S10 draws the comparison of reservoir water surface area time series against in situ, altimetric  
16 water levels, and GRSAD and ReaLSAT area time series for a sample of reservoirs of varying areas.
- 17 • Figure S11 shows an example that illustrates how the uncertainties in satellite datasets propagate to  
18 storage anomalies.
- 19 • Figure S12 reports the validation the evaporation values.
- 20 • Figure S13 shows the long-term mean meteorological variables that were used to calculate the evaporation  
21 rates.
- 22 • Figure S14 describes the spatial distribution of the ratios of reservoir water surface area and storage to  
23 catchment area.
- 24 ▪ Table S1 describes the providers of water level, water surface area, storage anomaly, and evaporation time  
25 series for Chinese reservoirs.
- 26 ▪ Tables S2-8 describes the source datasets for generating reservoir water level, water surface area, storage  
27 anomaly, upstream catchment, catchment-level characteristics products as well as the buffer distance for  
28 calculating reservoir area series in this study.
- 29 ▪ Tables S9-16 describes the attributes provided in our datasets.

30           ○ Text S1 details the procedures of correcting the errors of delineated catchments and removed unrealistic  
31           or incorrectly catchments.

32 All validation reports and datasets, please find them at Zenodo link: <https://doi.org/10.5281/zenodo.7664489>

33

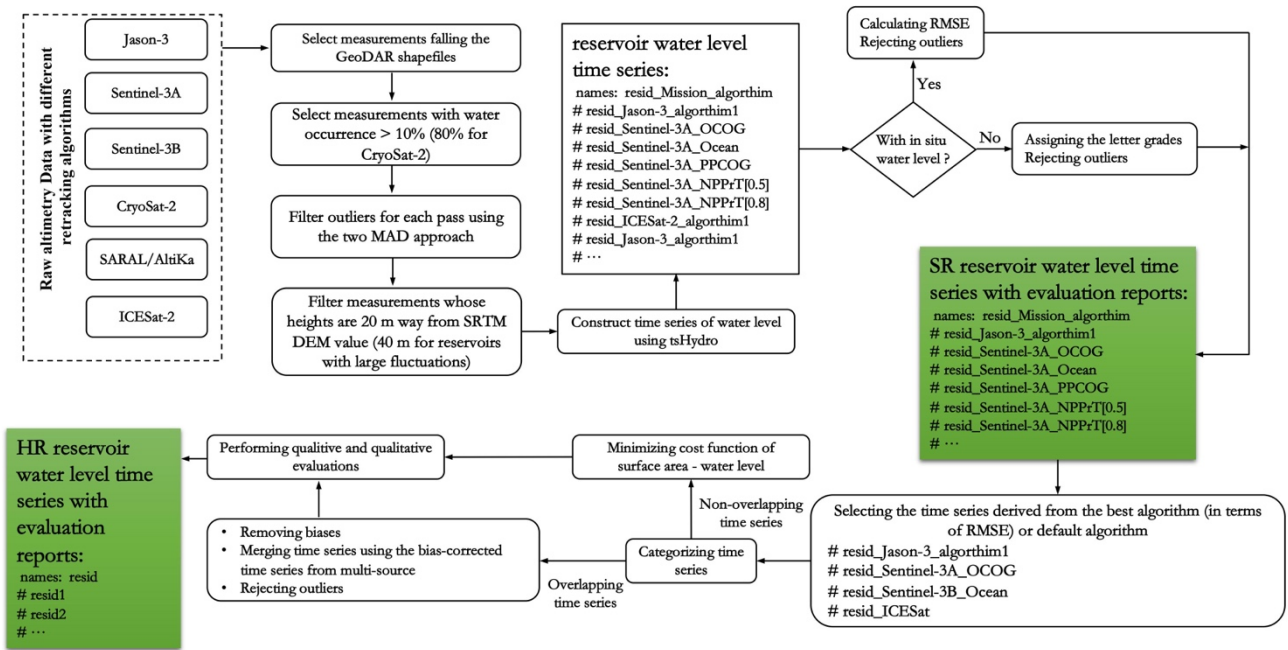

35

36 Figure S1. Flowchart of bias correction for obtaining SR and HR altimetric water level time series over reservoirs (Shen  
37 et al., 2022b).

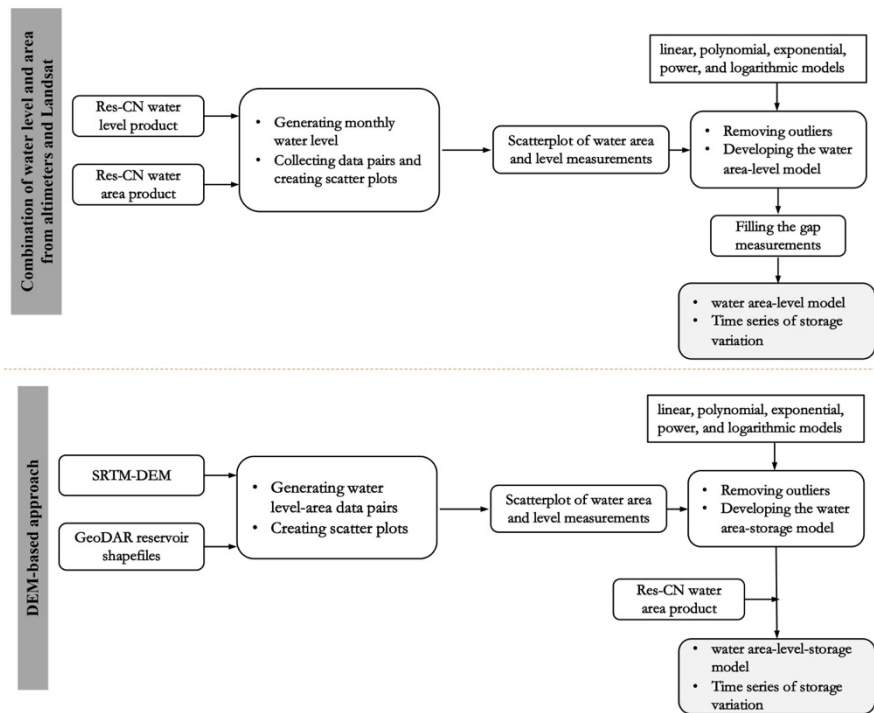

38

39 Figure S2. Flowchart of obtaining reservoir storage anomaly: 1) using water levels from satellite altimetry and water  
40 surface areas from satellite imagery (top panel); and 2) using imagery-based water areas and SRTM-DEM (bottom  
41 panel). (Shen et al., 2022b).

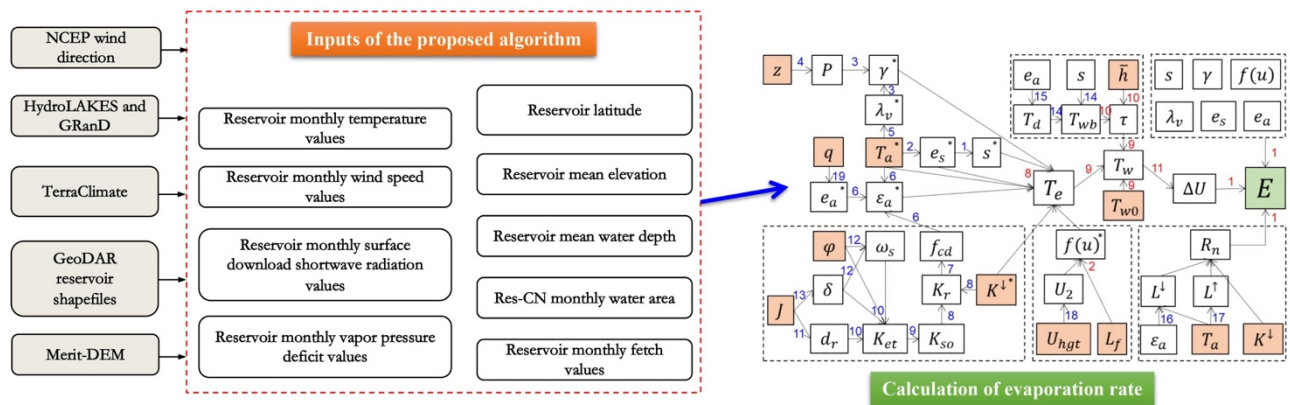

42  
 43 **Figure S3. Flowchart of the proposed algorithm for generating time series of reservoir evaporation. For more details**  
 44 **about the algorithm, evaporation calculation example, please find the [https://ars.els-cdn.com/content/image/1-s2.0-](https://ars.els-cdn.com/content/image/1-s2.0-S0034425719301063-mmc1.pdf)**  
 45 **S0034425719301063-mmc1.pdf.**

Distribution of reservoir area values and Top 20 reservoirs based on area size

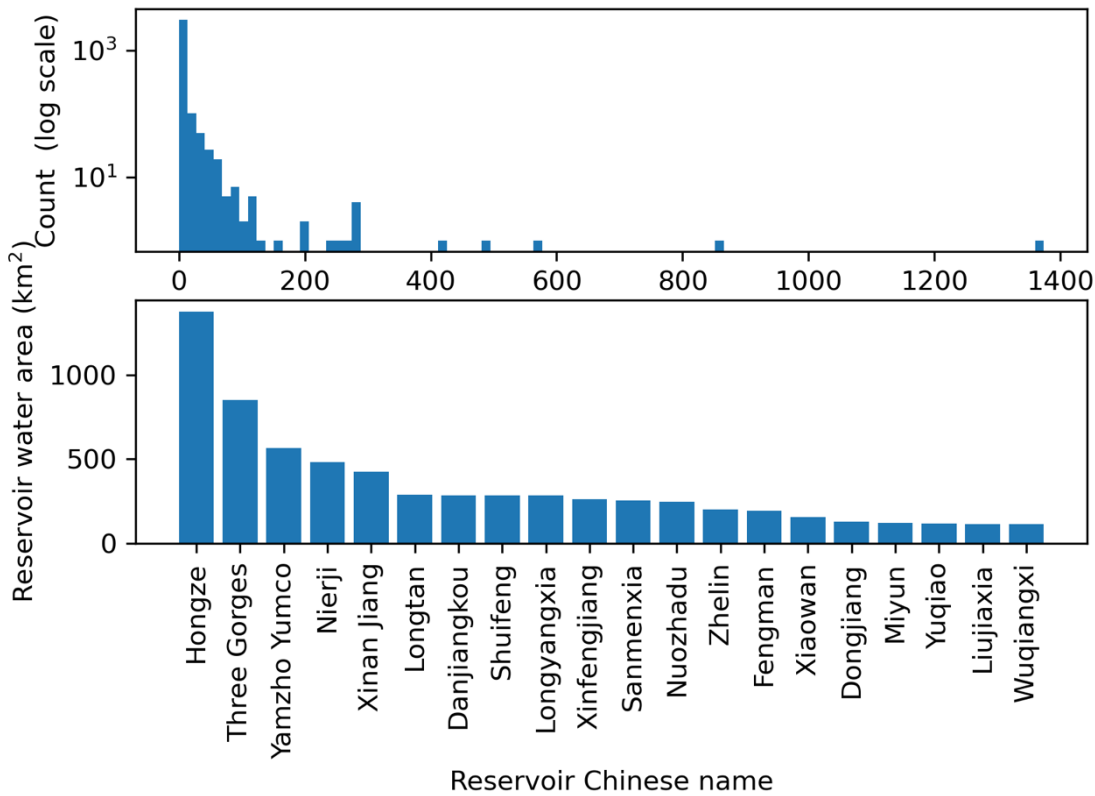

46  
 47 **Figure S4. Distribution of reservoir water surface area values and Top 20 reservoirs based on area size in our data**  
 48 **product. For more information such as area, name, and ID of all reservoirs, please refer to our data product.**

Comparison of catchment area

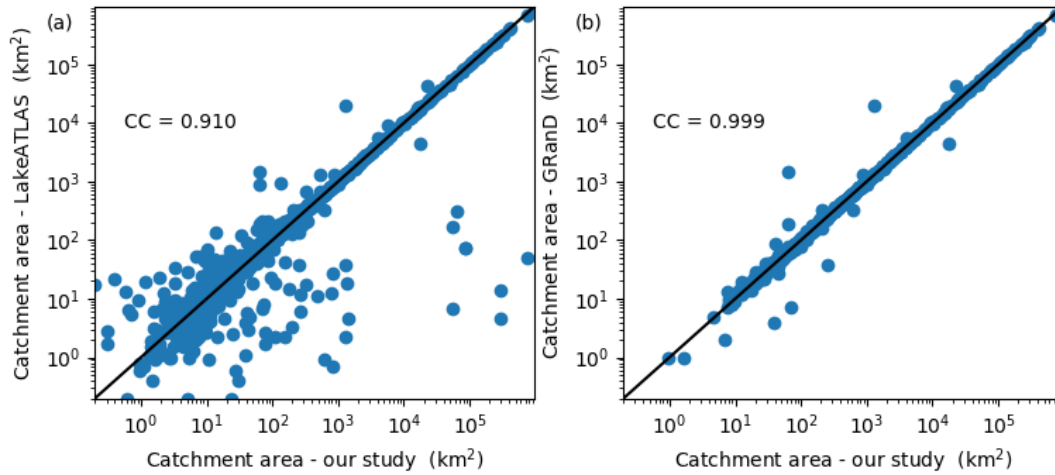

49

50 **Figure S5. Comparison of the areas of delineated catchments in this study with those of LakeATLAS (Lehner et al., 2022),**  
 51 **and those of GRand reported value (Lehner et al., 2011).**

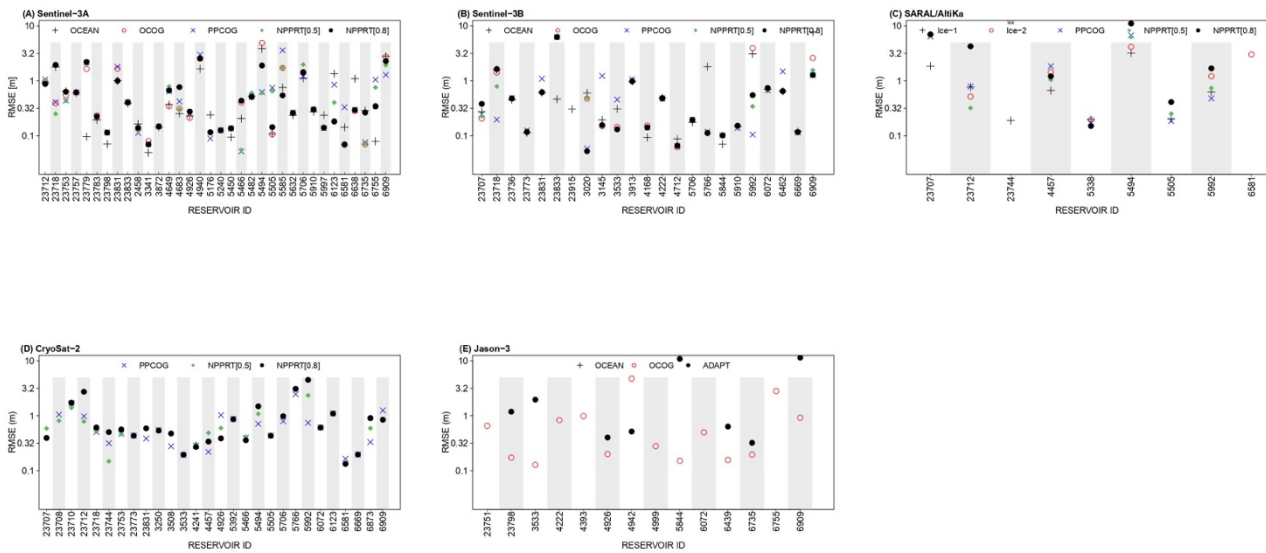

52

53 **Figure S6. Performances of altimetry-derived water level from each satellite altimeters with different retracking**  
 54 **algorithms.**

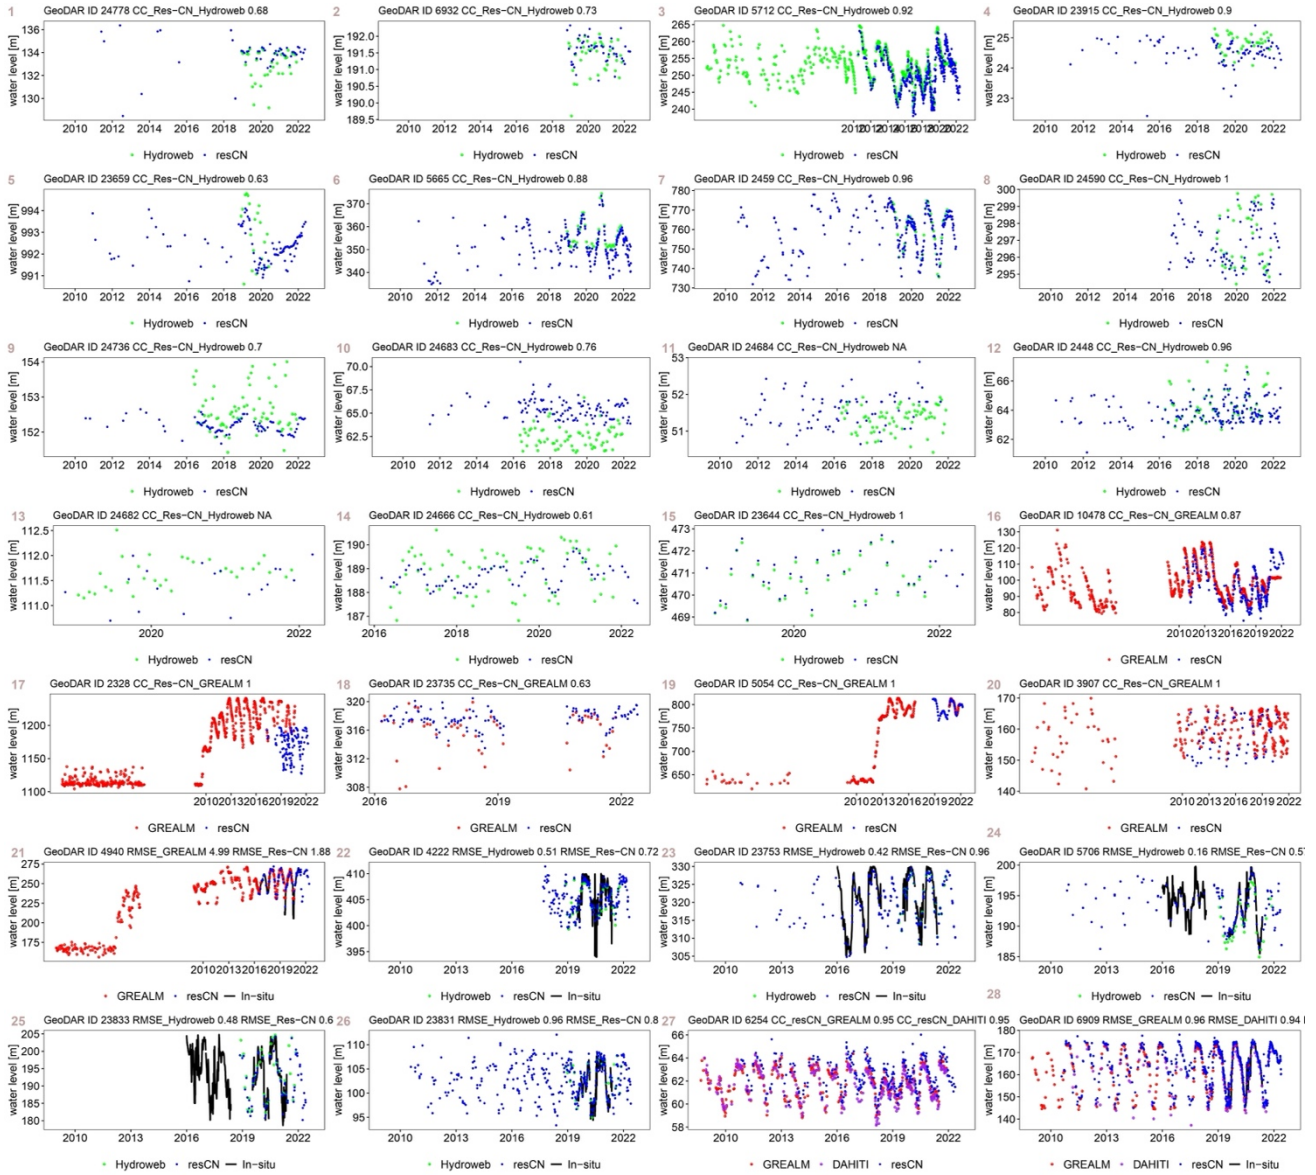

55

56 **Figure S7. Comparison between our water level time series and other existing similar databases.**

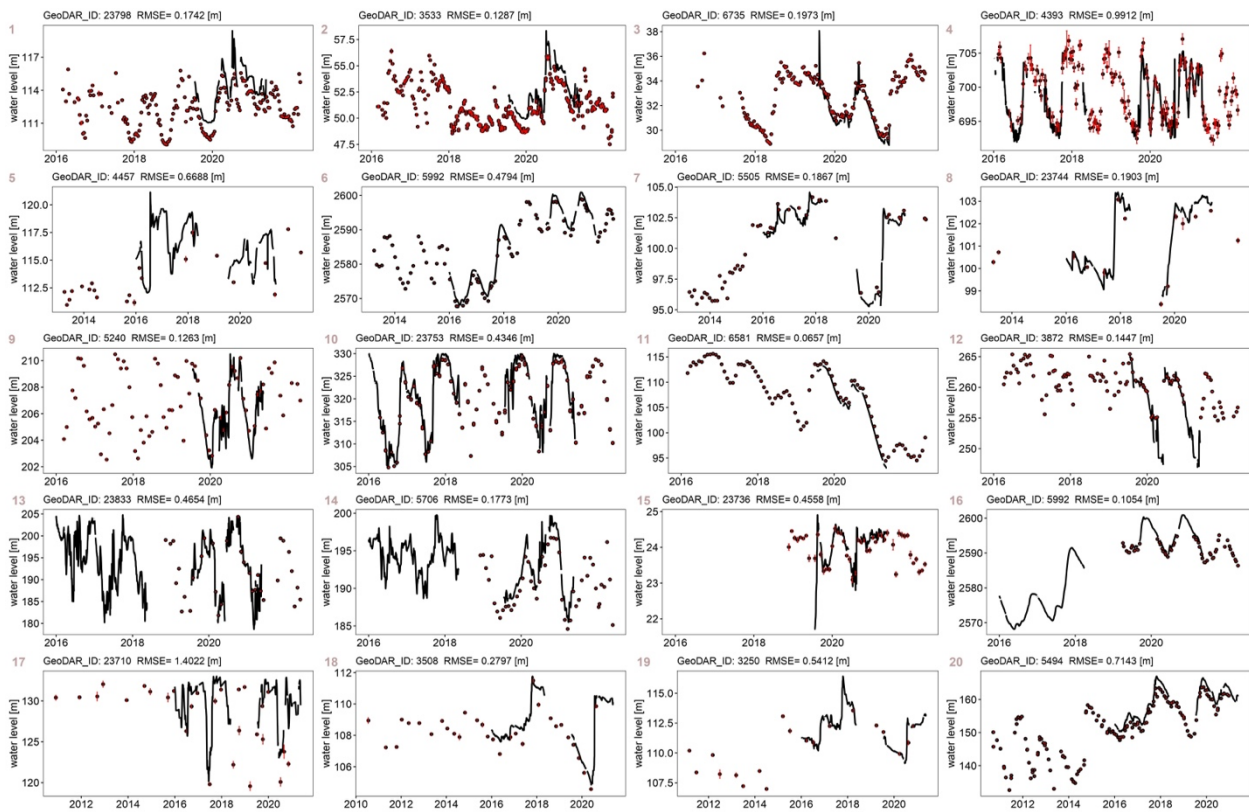

57

58 **Figure S8. Uncertainties for each value in the time series of reservoir water level. In the figure, black line refers to the**  
 59 **observed water level, dot is the altimetric water level, error bar quantifies the uncertainty of each value. Taking our**  
 60 **20 reservoirs in the standard rate product as an example, 1-4 are taken from Jason-3 mission, 5-8 are from**  
 61 **SARAL/AltiKa mission, 9-12 are from Sentinel-3A mission, 13-16 are from Sentinel-3B mission, 17-20 are from**  
 62 **CryoSat-2 mission. All uncertainties values are available in our product.**



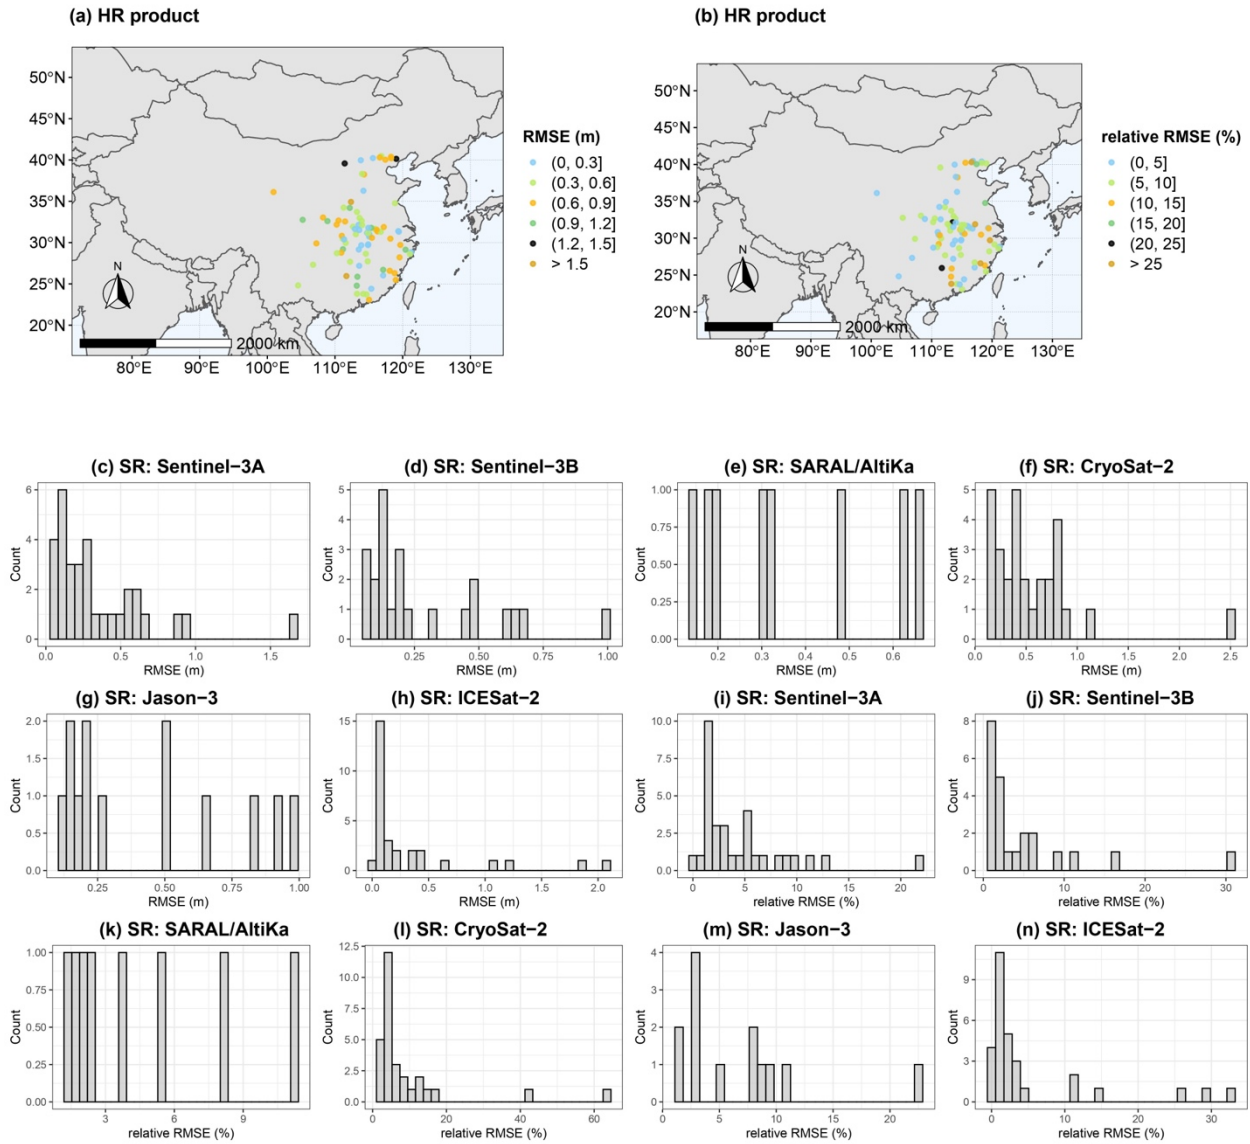

63

64 **Figure S9. Performance of the Standard-rate (SR) and High-rate (HR) products in terms of the RMSE and the relative**  
 65 **RMSE values of the validated reservoirs. For detailed validation metrics, please refer to our data.**

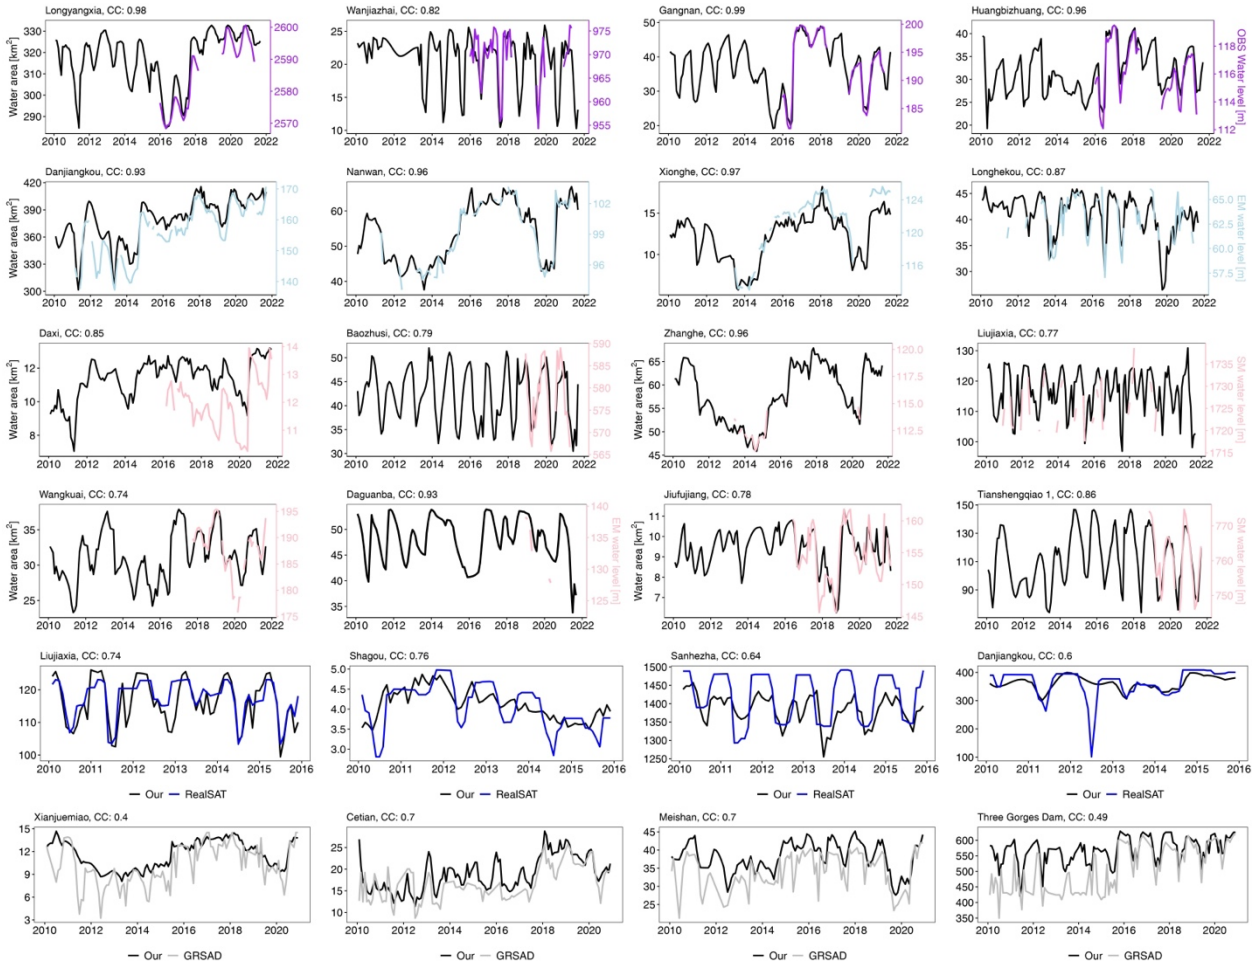

66

67 **Figure S10. Graphs showing reservoir water area time series against in situ water levels, altimetric water levels from**  
 68 **high and standard rates, and GRSAD and RealSAT area time series for a sample of reservoirs of varying areas (Shen et**  
 69 **al., 2022b).**

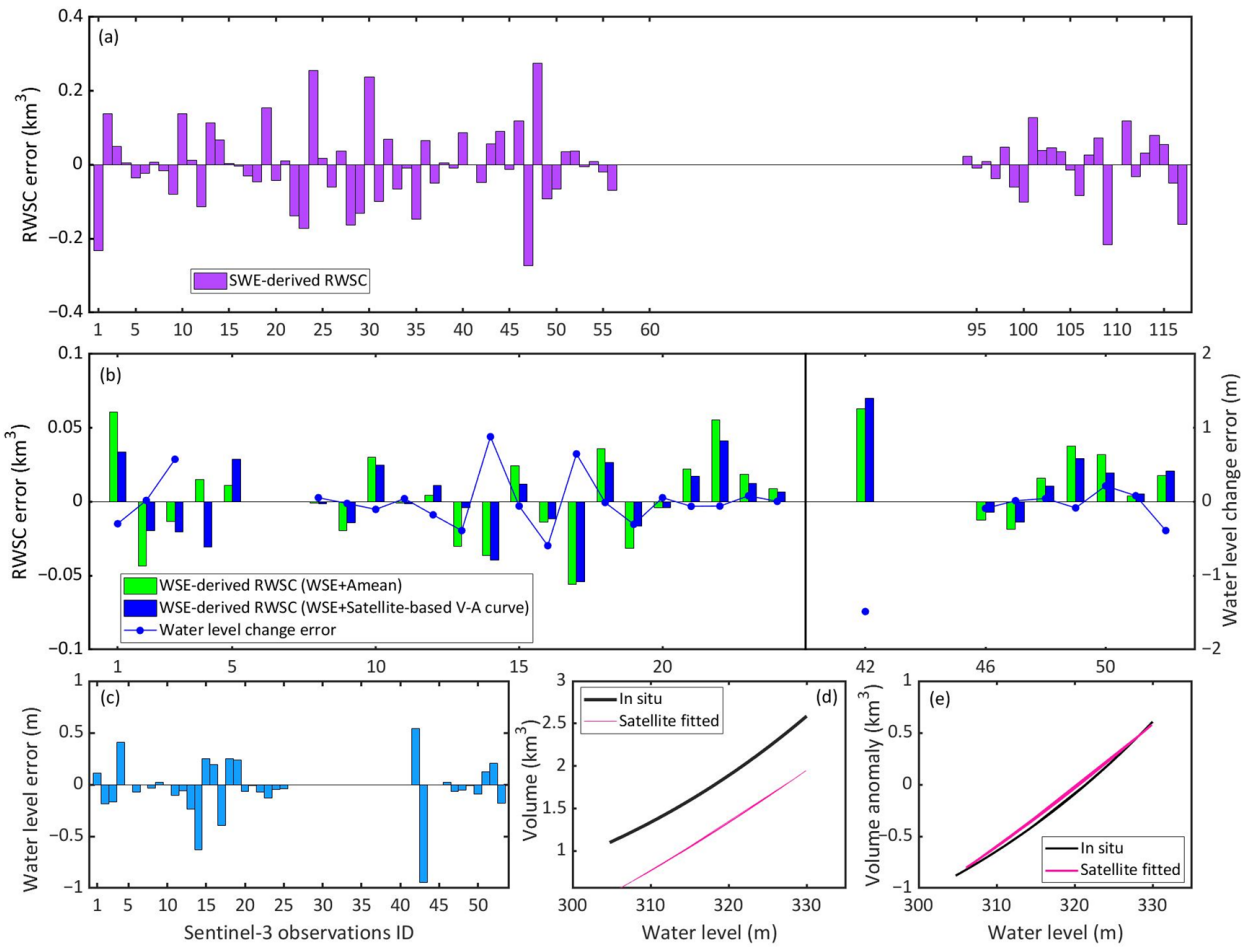

70  
 71 **Figure S11. Graphs showing an example that illustrates how the uncertainties in satellite datasets propagate to storage**  
 72 **anomalies. Error series and relationships of reservoir elevation-storage. Error series of (a) SWE-derived RWSC (i.e.,**  
 73 **storage anomaly), (b) WSE-derived RWSC and water level change, (c) WSE (i.e., water level). (d) and (e) Relationships**  
 74 **of elevation-storage. The numbers on the x-axis (a, b, c) refer to the IDs of SWE, WSE, and WSE change observations,**  
 75 **respectively. For more details about the propagation process, please find the reference Shen et al., (2020):**  
 76 **<https://doi.org/10.3390/rs14040815>.**

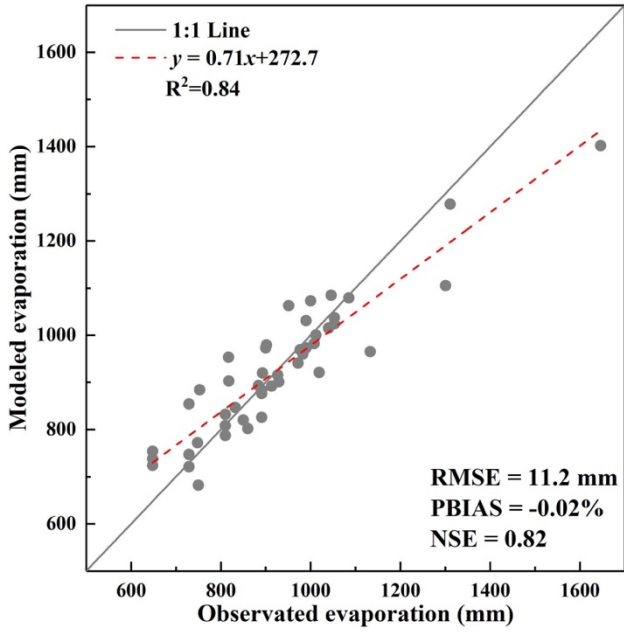

77

78 Figure S12. Observed and modeled average annual evaporation for 47 reservoirs (Tian et al., 2021).

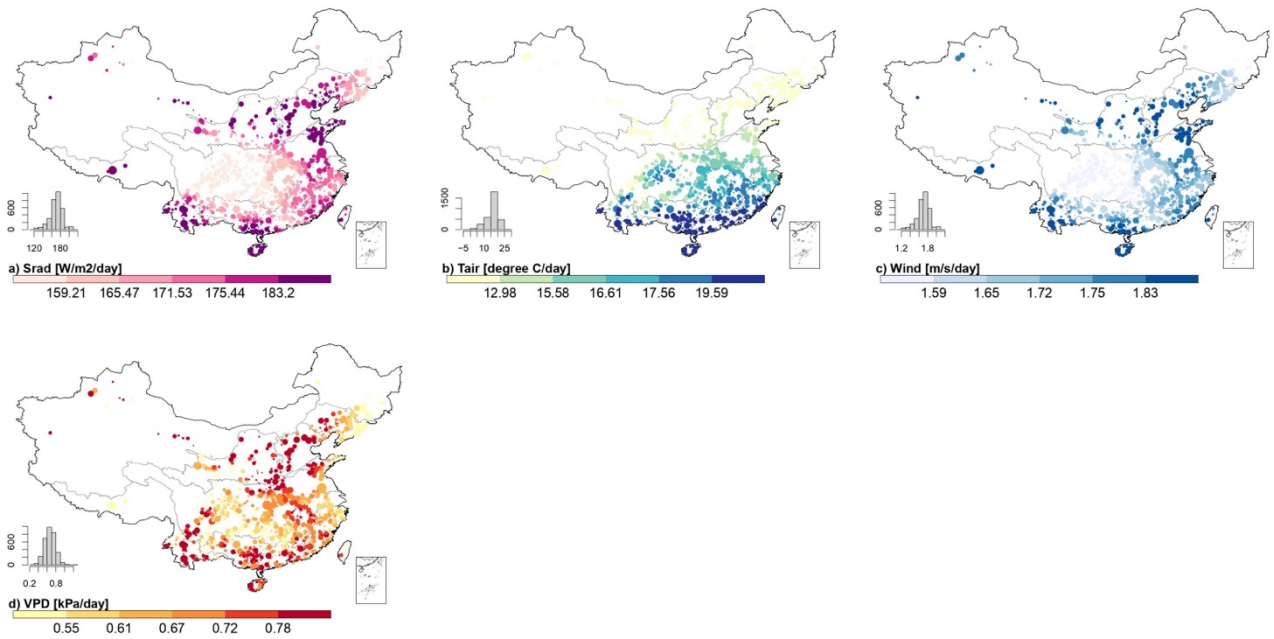

79

80 Figure S13. Long-term mean meteorological variables that were used to calculate the evaporation rates.

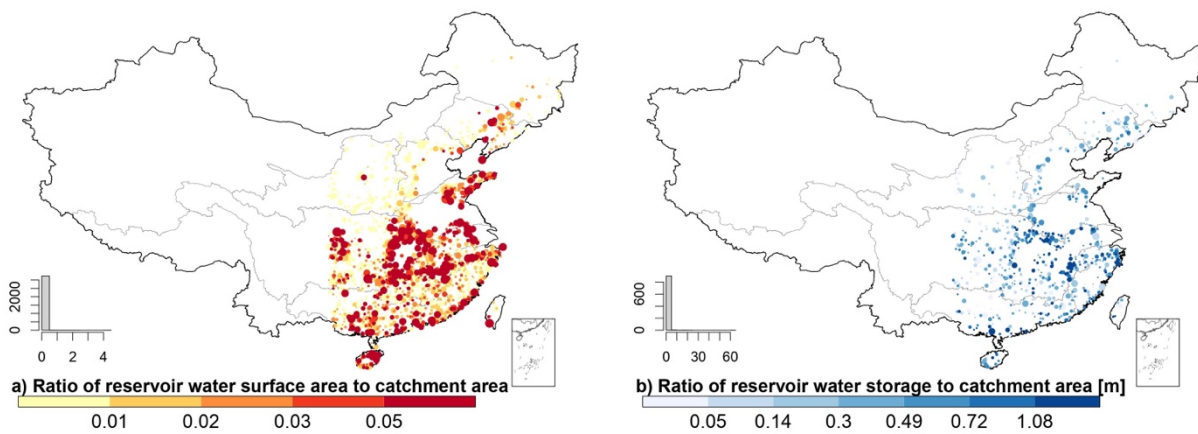

81

82 **Figure S14. Spatial distribution of the ratios of reservoir water surface area and storage to catchment area. Note: not**  
 83 **all reservoir water storage data are available from the GeoDAR database (Wang et al., 2022).**

84 **Tables**85 **Table S1. Providers of water level, water surface area, storage anomaly, and evaporation for Chinese reservoirs.**86 **Water levels:**

| <b>Data sources</b>          | <b>No. of reservoirs</b> | <b>Time and temporal resolution</b> | <b>Download link</b>                                                                                                          |
|------------------------------|--------------------------|-------------------------------------|-------------------------------------------------------------------------------------------------------------------------------|
| <b>Hydroweb</b>              | 32                       | 1992–2023, 10–35 day                | <a href="http://hydroweb.theia-land.fr/">http://hydroweb.theia-land.fr/</a>                                                   |
| <b>DAHITI</b>                | 8                        | 2002–2023, 10–35 day                | <a href="https://dahiti.dgfi.tum.de/en/">https://dahiti.dgfi.tum.de/en/</a>                                                   |
| <b>G-REALM</b>               | ~30                      | 1992–2023, 10–35 day                | <a href="https://ipad.fas.usda.gov/cropexplorer/global_reservoir">https://ipad.fas.usda.gov/cropexplorer/global_reservoir</a> |
| <b>Tortini et al. (2020)</b> | <10                      | 1992–2018, sub-monthly              | <a href="https://doi.org/10.5067/UCLRS-GREV2">https://doi.org/10.5067/UCLRS-GREV2</a>                                         |
| <b>Shen et al. (2022b)</b>   | 338                      | 2010–2021, monthly                  | <a href="https://doi.org/10.5281/zenodo.7251283">https://doi.org/10.5281/zenodo.7251283</a>                                   |

87 \* Last access: 15 October 2022.

88 **Water surface areas:**

| <b>Data sources</b>                | <b>Number of reservoirs</b>  | <b>Time and temporal resolution</b> | <b>Download link</b>                                                                                                           |
|------------------------------------|------------------------------|-------------------------------------|--------------------------------------------------------------------------------------------------------------------------------|
| <b>Bluedot observatory</b>         | Not clear                    | 2016–2021, sub-monthly              | <a href="https://blue-dot-observatory.com/">https://blue-dot-observatory.com/</a> *                                            |
| <b>GRASD</b>                       | 923                          | 1984–2018, monthly                  | <a href="https://doi.org/10.18738/T8/DF80WG">https://doi.org/10.18738/T8/DF80WG</a> * (Zhao and Gao, 2018; Gao and Zhao, 2019) |
| <b>Khandelwal and Kumar (2019)</b> | <10                          | 1992–2018, sub-monthly              | <a href="https://doi.org/10.5067/UCLRS-AREV2">https://doi.org/10.5067/UCLRS-AREV2</a> *                                        |
| <b>RealSAT</b>                     | 85522 (lakes and reservoirs) | 1984–2015, monthly                  | <a href="https://doi.org/10.5281/zenodo.6468209">https://doi.org/10.5281/zenodo.6468209</a> * (Khandelwal et al., 2022)        |
| <b>Donchyts et al. (2022)</b>      | 9418                         | 1985–2021, monthly                  | <a href="https://doi.org/10.6084/m9.figshare.20359860.v1">https://doi.org/10.6084/m9.figshare.20359860.v1</a> *                |
| <b>Yao et al. (2019)</b>           | ~8                           | 1992–2018, sub-monthly              | <a href="https://lakewatch.users.earthengine.app/view/glats">https://lakewatch.users.earthengine.app/view/glats</a> *          |
| <b>Shen et al. (2022b)</b>         | 338                          | 2010–2021, monthly                  | <a href="https://doi.org/10.5281/zenodo.7251283">https://doi.org/10.5281/zenodo.7251283</a> *                                  |

89

90

91 **Storage anomalies:**

| <b>Data sources</b>          | <b>Number of reservoirs</b> | <b>Time and temporal resolution</b> | <b>Download link</b>                                                                          |
|------------------------------|-----------------------------|-------------------------------------|-----------------------------------------------------------------------------------------------|
| <b>Vu et al. (2022)</b>      | 10                          | 2008–2020, monthly                  | <a href="https://doi.org/10.5281/zenodo.6299041">https://doi.org/10.5281/zenodo.6299041</a> * |
| <b>Tortini et al. (2019)</b> | <10                         | 1992–2018, sub-monthly              | <a href="https://doi.org/10.5067/UCLRS-STOV2">https://doi.org/10.5067/UCLRS-STOV2</a> *       |
| <b>Hou et al. (2022)</b>     | 923                         | 1984–2015, monthly                  | Not publicly accessible                                                                       |
| <b>Shen et al. (2021)</b>    | 337                         | 2010–2021, monthly                  | <a href="https://doi.org/10.5281/zenodo.7251283">https://doi.org/10.5281/zenodo.7251283</a> * |
| <b>Zhao et al. 2022</b>      | >4,000                      | 1984–2020, monthly                  | <a href="https://doi.org/10.5281/zenodo.4646621">https://doi.org/10.5281/zenodo.4646621</a> * |

92

93

94 **Evaporation:**

| Data sources      | Number of reservoirs | Time and temporal resolution | Download link                                                                                |
|-------------------|----------------------|------------------------------|----------------------------------------------------------------------------------------------|
| Zhao et al. 2022  | >4,000               | 1984-2020, monthly           | <a href="https://doi.org/10.5281/zenodo.4646621">https://doi.org/10.5281/zenodo.4646621*</a> |
| Tian et al., 2022 | 908                  | 1984-2016, monthly           | <a href="https://doi.org/10.5281/zenodo.6042127">https://doi.org/10.5281/zenodo.6042127*</a> |

95 \* Last access: 24 Feb 2023.

96

97

98

99 **Table S2. Source datasets for generating reservoir water level product in this study.**

| Satellite                     | Data period    | Retracking algorithms                                    | Repeat cycle |
|-------------------------------|----------------|----------------------------------------------------------|--------------|
| CryoSat-2                     | 2010-2022.5    | PPCOG, NPPTr[0.5], NPPTr[0.8]                            | 369 days     |
| SARAL/AltiKa                  | 2016-2022.5    | PPCOG, NPPTr[0.5], NPPTr[0.8], ICE-1, ICE-2              | 35 days      |
| Sentinel-3A                   | 2016.2-2022.5  | PPCOG, NPPTr[0.5], NPPTr[0.8], OCOG, Ocean               | 27 days      |
| Sentinel-3B                   | 2018.4-2022.5  | PPCOG, NPPTr[0.5], NPPTr[0.8], OCOG, Ocean               | 27 days      |
| Jason-3                       | 2016-2022.5    | Adapt, OCOG, Ocean                                       | 10 days      |
| ICESat-2                      | 2018.10-2022.5 | Official                                                 | 91 days      |
| In situ                       | 2015-2021.5    | - (99 reservoirs with observational water level records) | 1 day        |
| Global Surface Water Explorer | 1984-2020      | - (water occurrence product version 1.3)                 | -            |
| SRTM-DEM                      | 2000           | -                                                        | -            |

100 Source download links:

- 101 - SARAL/AltiKa Geophysical Data Records (GDRs) from CNES AVISO+ at <ftp://avisoftp.cnes.fr/AVISO/pub/>
- 102 - CryoSat-2 baseline C level 1b dataset from ESA at <https://science-pds.cryosat.esa.int/>
- 103 - Sentinel-3 level 2 "Enhanced measurements" datasets from Copernicus Open Access Hub at
- 104 <https://scihub.copernicus.eu/dhus/>.
- 105 - Jason-3 from <ftp://avisoftp.cnes.fr/AVISO/pub/>
- 106 - ICESat-2 ATL13 product from <https://icesat-2.gsfc.nasa.gov/science/data-products>
- 107 - In situ water level for 99 reservoirs from the local governments at
- 108 <http://113.57.190.228:8001/web/Report/BigMSKReport> and National Hydrological Information Centre at
- 109 <http://xxfb.mwr.cn/index.html>
- 110 - Global Surface Water Explorer from the <https://global-surface-water.appspot.com/>.
- 111 - SRTM-DEM from the <https://srtm.csi.cgiar.org/srtmdata/>.

112 Last access: 15 October 2022

113

114

115

116 **Table S3. Source datasets for generating reservoir water surface area product in this study.**

| Product  | Data period | Remark                                                               | Download link                                                                                     |
|----------|-------------|----------------------------------------------------------------------|---------------------------------------------------------------------------------------------------|
| GeoDAR   | -           | Reservoir shapefiles                                                 | <a href="https://doi.org/10.5281/zenodo.6163413">https://doi.org/10.5281/zenodo.6163413</a>       |
| JRC-GWSD | 1984-2020   | Two products are used: monthly history and water occurrence products | <a href="https://global-surface-water.appspot.com/">https://global-surface-water.appspot.com/</a> |

117 Last access: 15 October 2022

118

119 **Table S4. Source datasets for generating reservoir storage anomaly product in this study.**

| Product                   | Data period | Remark                                                 | Download link                                                                                                                                                                                    |
|---------------------------|-------------|--------------------------------------------------------|--------------------------------------------------------------------------------------------------------------------------------------------------------------------------------------------------|
| Res-CN water surface area | 1984-2021   | Generated in in this study                             | <a href="https://doi.org/10.5281/zenodo.7664489">https://doi.org/10.5281/zenodo.7664489</a>                                                                                                      |
| SRTM-DEM                  | 2000        | -                                                      | <a href="https://srtm.csi.cgiar.org/srtmdata/">https://srtm.csi.cgiar.org/srtmdata/</a>                                                                                                          |
| In situ                   | 2015-2021.5 | 139 reservoirs with daily water level and storage data | <a href="http://113.57.190.228:8001/web/Report/BigMSKReport">http://113.57.190.228:8001/web/Report/BigMSKReport</a><br><a href="http://xxfb.mwr.cn/index.html">http://xxfb.mwr.cn/index.html</a> |

120 Last access: 15 October 2022

121

122

123 **Table S5. Source datasets for generating reservoir evaporation product in this study.**

| Satellite                 | Data period | Remark                                                                                                        | Download link                                                                                                                         |
|---------------------------|-------------|---------------------------------------------------------------------------------------------------------------|---------------------------------------------------------------------------------------------------------------------------------------|
| GeoDAR                    | -           | Reservoir shapefiles                                                                                          | <a href="https://doi.org/10.5281/zenodo.6163413">https://doi.org/10.5281/zenodo.6163413</a>                                           |
| TerraClimate              | 1984-2020   | Four variables: air temperature, wind speed, vapor pressure deficit, and surface downward shortwave radiation | <a href="https://climate.northwestknowledge.net/TERRACLIMATE/">https://climate.northwestknowledge.net/TERRACLIMATE/</a>               |
| Res-CN water surface area | 1984-2021   | Generated in in this study                                                                                    | <a href="https://global-surface-water.appspot.com/">https://global-surface-water.appspot.com/</a>                                     |
| NCEP                      | 1984-2020   | wind direction data from National Centers for Environmental Prediction                                        | <a href="https://psl.noaa.gov/data/gridded/data.ncep.reanalysis.html">https://psl.noaa.gov/data/gridded/data.ncep.reanalysis.html</a> |
| Merit-DEM                 | 2019        | To derive mean elevation                                                                                      | <a href="http://hydro.iis.u-tokyo.ac.jp/~yamadai/MERIT_DEM/">http://hydro.iis.u-tokyo.ac.jp/~yamadai/MERIT_DEM/</a>                   |
| HydroLAKES                | -           | To derive mean water depth                                                                                    | <a href="https://www.hydrosheds.org/products/hydrolakes">https://www.hydrosheds.org/products/hydrolakes</a>                           |
| GRanD                     | -           | To derive mean water depth                                                                                    | <a href="https://globaldamwatch.org/grand/">https://globaldamwatch.org/grand/</a>                                                     |

124 Last access: 15 October 2022

125

126

127 **Table S6. Source datasets for generating reservoir upstream catchment product in this study.**

| Satellite   | Data period | Remark                         | Download link                                                                                                           |
|-------------|-------------|--------------------------------|-------------------------------------------------------------------------------------------------------------------------|
| GeoDAR      | -           | Reservoirs and dams shapefiles | <a href="https://doi.org/10.5281/zenodo.6163413">https://doi.org/10.5281/zenodo.6163413</a>                             |
| Merit-Hydro | 2019        | Flow directions                | <a href="http://hydro.iis.u-tokyo.ac.jp/~yamadai/MERIT_Hydro/">http://hydro.iis.u-tokyo.ac.jp/~yamadai/MERIT_Hydro/</a> |

128 Last access: 15 October 2022



**Table S7. Source datasets for generating catchment-level characteristics product in this study.**

| Category                                      | Source data                                                   | Remark                                                     | Download link                                                                                                                                                                                                                                     |
|-----------------------------------------------|---------------------------------------------------------------|------------------------------------------------------------|---------------------------------------------------------------------------------------------------------------------------------------------------------------------------------------------------------------------------------------------------|
| <b>Topography</b>                             | Merit-dem and Merit-Hydro                                     | Yamazaki et al. (2017, 2019)                               | <a href="http://hydro.iis.u-tokyo.ac.jp/~yamadai/">http://hydro.iis.u-tokyo.ac.jp/~yamadai/</a> *                                                                                                                                                 |
|                                               | GeoDAR                                                        | Reservoir shapefiles                                       | <a href="https://doi.org/10.5281/zenodo.6163413">https://doi.org/10.5281/zenodo.6163413</a> *                                                                                                                                                     |
|                                               | Our study                                                     | Catchment shapefiles                                       | Provided in the main text.                                                                                                                                                                                                                        |
| <b>Climate</b>                                | National Station-based Climatic Data set V3                   | 800 gauges offering 10 variables                           | closed                                                                                                                                                                                                                                            |
|                                               | Global Aridity Index and Global Reference Evapo-Transpiration | Zomer, R. J. (2022)                                        | <a href="https://cgiarcsi.community/2019/01/24/global-aridity-index-and-potential-evapotranspiration-climate-database-v3/">https://cgiarcsi.community/2019/01/24/global-aridity-index-and-potential-evapotranspiration-climate-database-v3/</a> * |
| <b>Land cover</b>                             | NPP, GPP, NDVI, LAI, EVI                                      | Myneni et al., 2015; Didan, 2021; Running et al., 202a, b; | Available at GEE (original datasets and references are in the main texts)                                                                                                                                                                         |
|                                               | IGBP, Zeng, X. (2001)                                         | Rooting depth                                              | <a href="https://lpdaac.usgs.gov/products/mcd12q1v006/">https://lpdaac.usgs.gov/products/mcd12q1v006/</a> *                                                                                                                                       |
|                                               | ESA WorldCover 2020, 10m                                      | 10 Land cover types                                        | <a href="https://worldcover2020.esa.int/">https://worldcover2020.esa.int/</a> *                                                                                                                                                                   |
| <b>Soil</b>                                   | SoilGrids250m                                                 | Hengl et al. (2017)                                        | <a href="https://files.isric.org/soilgrids/former/2017-03-10/data/">https://files.isric.org/soilgrids/former/2017-03-10/data/</a> *                                                                                                               |
|                                               | Dai et al. (2019)                                             | Soil hydraulic and thermal properties                      | <a href="http://globalchange.bnu.edu.cn/research/soil5.jsp">http://globalchange.bnu.edu.cn/research/soil5.jsp</a> *                                                                                                                               |
|                                               | Shangguan et al. (2013)                                       | Soil property data                                         | <a href="http://globalchange.bnu.edu.cn/research/soil2">http://globalchange.bnu.edu.cn/research/soil2</a> *                                                                                                                                       |
| <b>Geology</b>                                | GLHYMPS (Global Hydrogeology MaPS)                            | Gleeson et al. (2014)                                      | <a href="https://borealisdata.ca/dataset.xhtml?persistentId=doi:10.5683/SP2/DLGXYO">https://borealisdata.ca/dataset.xhtml?persistentId=doi:10.5683/SP2/DLGXYO</a> *                                                                               |
|                                               | GliM (Global Lithological Map)                                | Hartmann and Moosdorf, 2012                                | <a href="https://doi.pangaea.de/10.1594/PANGAEA.788537">https://doi.pangaea.de/10.1594/PANGAEA.788537</a> *                                                                                                                                       |
| <b>Anthropogenic activity characteristics</b> | Gridded Population of the World (GPW)                         | Population amount in 2000, 2005, 2010, 2015, and 2020      | <a href="https://sedac.ciesin.columbia.edu/">https://sedac.ciesin.columbia.edu/</a> *                                                                                                                                                             |
|                                               | Global Roads Inventory Project (GRIP) dataset                 | Road density                                               | <a href="https://www.globio.info/download-grip-dataset">https://www.globio.info/download-grip-dataset</a> *                                                                                                                                       |
|                                               | Global Human Footprint v2                                     | Human Footprint                                            | <a href="https://sedac.ciesin.columbia.edu/data/set/wildareas-v2-human-footprint-geographic/data-download">https://sedac.ciesin.columbia.edu/data/set/wildareas-v2-human-footprint-geographic/data-download</a> *                                 |
|                                               | DMSP-OLS Nighttime Lights v4 dataset                          | Doll, 2008                                                 | <a href="https://eogdata.mines.edu/products/dmsp/">https://eogdata.mines.edu/products/dmsp/</a> *                                                                                                                                                 |

\*Last access: 15 October 2022.

132 **Ta**

133 **ble S8. Buffering distance for GeoDAR reservoir datasets.**

| <b>Buffered distance (m)</b> | <b>Number of reservoirs</b> | <b>Reservoir water surface area (km<sup>2</sup>)</b> |
|------------------------------|-----------------------------|------------------------------------------------------|
| <b>150</b>                   | 650                         | $A \leq 0.1$                                         |
| <b>250</b>                   | 1515                        | $0.1 \leq A \leq 1$                                  |
| <b>500</b>                   | 795                         | $1 \leq A \leq 10$                                   |
| <b>750</b>                   | 273                         | $10 \leq A \leq 100$                                 |
| <b>1000</b>                  | 21                          | $100 \leq A \leq 1000$                               |

134

135

**Table S9. Attributes of reservoirs provided in the Res-CN.**

| <b>Attribute</b>                   | <b>Unit</b>                   | <b>Description and values</b>                                                                   |
|------------------------------------|-------------------------------|-------------------------------------------------------------------------------------------------|
| <b>id_v11</b>                      | -                             | Dam ID of GeoDAR version 1.1                                                                    |
| <b>id_grd_v13</b>                  | -                             | GRanD ID of this dam if also included in GRanD v1.3                                             |
| <b>lat</b>                         | degree                        | Latitude of the dam point                                                                       |
| <b>lon</b>                         | degree                        | Longitude of the dam point                                                                      |
| <b>rv_mcm_v11</b>                  | millions<br>of m <sup>3</sup> | Reservoir storage capacity taken from Wada et al. (2017) and GRanD v1.3                         |
| <b>plg_a_km2</b>                   | km <sup>2</sup>               | Area of the retrieved reservoir polygon                                                         |
| <b>length</b>                      | km                            | Perimeter of the reservoir                                                                      |
| <b>elev</b>                        | m                             | Mean reservoir elevation from Merit-DEM (Yamazaki et al., 2019)                                 |
| <b>region</b>                      | -                             | Reservoir-based River basins                                                                    |
| <b>reservoir_development_index</b> | -                             | Ratio: perimeter of the reservoir / perimeter of the circle whose area is that of the reservoir |

Note: missing or inapplicable values are filled by “-999”.

136

137

**Table S10. Attributes of topography provided in the Res-CN.**

| Attribute                      | Unit                | Description                                                                                                                                                                                                                                            | Data source and reference                                       |
|--------------------------------|---------------------|--------------------------------------------------------------------------------------------------------------------------------------------------------------------------------------------------------------------------------------------------------|-----------------------------------------------------------------|
| <b>length</b>                  | m                   | The length of the main stream measured from the basin outlet to the remotest point on the basin boundary. The main stream is identified by starting from the basin outlet and moving up the catchment.                                                 | Subramanya (2013)                                               |
| <b>area</b>                    | km <sup>2</sup>     | Calculated catchment area                                                                                                                                                                                                                              | Merri-Hydro (Yamazaki et al., 2019), GeoDAR (Wang et al., 2022) |
| <b>elev</b>                    | m                   | Mean catchment elevation                                                                                                                                                                                                                               | Merit-DEM (Yamazaki et al., 2019)                               |
| <b>elev_max</b>                | m                   | Maximum catchment elevation                                                                                                                                                                                                                            | See above                                                       |
| <b>elev_min</b>                | m                   | Minimum catchment elevation                                                                                                                                                                                                                            | See above                                                       |
| <b>elev_std</b>                | m                   | Standard deviation of elevation in catchment                                                                                                                                                                                                           | See above                                                       |
| <b>elev_range</b>              | m                   | Range of catchment elevation (maximum minus minimum elevation)                                                                                                                                                                                         | See above                                                       |
| <b>slope</b>                   | m km <sup>-1</sup>  | Mean catchment slope, Horn (1981)                                                                                                                                                                                                                      | See above                                                       |
| <b>mvert_dist</b>              | km                  | Horizontal distance from the farthest point of the catchment to the corresponding gauge (length axis)                                                                                                                                                  | Merri-Hydro (Yamazaki et al., 2019)                             |
| <b>mvert_ang</b>               | degree              | Angle between the north direction and connection from farthest point of catchment to the corresponding gauge (length axis); e.g., direction from north (farthest catchment point) to south (gauge):180 degree, direction from east to west: 270 degree | See above                                                       |
| <b>elongation_ratio</b>        | -                   | Ratio: elongation ratio, i.e., ratio between the diameter of an equivalent circle and the area of the catchment area to its length, Schumm (1956)                                                                                                      | Subramanya, K. (2013)                                           |
| <b>strm_dens</b>               | km km <sup>-2</sup> | Ratio: stream density, i.e., ratio of lengths of streams and the catchment area                                                                                                                                                                        | See above                                                       |
| <b>resArea</b>                 | km <sup>2</sup>     | reservoir area.                                                                                                                                                                                                                                        | Wang et al. (2022)                                              |
| <b>form_factor</b>             | -                   | Ratio: catchment area / (length) <sup>2</sup>                                                                                                                                                                                                          | Subramanya, K. (2013)                                           |
| <b>shape_factor</b>            | -                   | Ratio: (catchment length) <sup>2</sup> / catchment area                                                                                                                                                                                                | See above                                                       |
| <b>circulatory_ratio</b>       | -                   | Ratio: perimeter of the catchment / perimeter of the circle whose area is that of the basin                                                                                                                                                            | See above                                                       |
| <b>compactness_coefficient</b> | -                   | Ratio: perimeter of the catchment / perimeter of the circle whose area is that of the basin                                                                                                                                                            | See above                                                       |
| <b>resArearatio</b>            | -                   | Ratio: reservoir area / catchment area                                                                                                                                                                                                                 | Merri-Hydro (Yamazaki et al., 2019), GeoDAR (Wang et al., 2022) |
| <b>relief</b>                  | -                   | Ratio: mean catchment elevation / Maximum catchment elevation                                                                                                                                                                                          | See above                                                       |

140

**Table S11. Meteorological data provided in the Res-CN.**

| Variable  | Unit | Description                                                 | Source                                                  |
|-----------|------|-------------------------------------------------------------|---------------------------------------------------------|
| DOY       | -    | Day of year                                                 | -                                                       |
| pet_mean  | mm/d | Mean daily PET (Penman–Monteith equation)                   | Subramanya (2013), Nation station-based climate data v3 |
| ep        | mm/d | Mean daily evaporation (observations)                       | Nation station-based climate data v3, 1980-2020         |
| ts        | °C   | Mean, maximum, and minimum daily ground surface temperature | See above                                               |
| prec_nscd | mm/d | Mean daily precipitation                                    | See above                                               |
| prs       | hpa  | Mean, maximum, and minimum daily ground surface pressure    | See above                                               |
| humid     | -    | Mean daily relative humidity                                | See above                                               |
| sun       | h    | Mean daily sunshine duration                                | See above                                               |
| ta        | °C   | Mean, maximum, and minimum daily temperature                | See above                                               |
| wind      | m/s  | Mean, and maximum daily wind speed                          | See above                                               |

141

142

**Table S12. Climate indices provided in the Res-CN.**

| Attribute  | Unit                | Description                                                                                                                                                                                                                                                                                                                           | Data source                                                             |
|------------|---------------------|---------------------------------------------------------------------------------------------------------------------------------------------------------------------------------------------------------------------------------------------------------------------------------------------------------------------------------------|-------------------------------------------------------------------------|
| p_mean     | mm/d                | Mean daily precipitation <sup>a</sup>                                                                                                                                                                                                                                                                                                 | Nation station-based climate data v3                                    |
| et0_mean   | mm/d                | Mean daily reference evapotranspiration ET0 <sup>b</sup>                                                                                                                                                                                                                                                                              | Global Evapo-Transpiration (ET0) Database v3 (Zomer and Trabucco, 2022) |
| arid       | -                   | Global Aridity Index Database v3 <sup>b</sup>                                                                                                                                                                                                                                                                                         | Global Aridity Index Database v3 (Zomer and Trabucco, 2022)             |
| p_season   | -                   | Seasonality and timing of precipitation (estimated using sine curves) to represent the annual precipitation cycles; positive (negative) values indicate that precipitation sums are higher during summer (winter) months; values close to 0 indicate uniform precipitation throughout the year; Eq. (14) in Woods (2009) <sup>a</sup> | Nation station-based climate data v3                                    |
| frac_snow  | -                   | Fraction of precipitation falling as snow, i.e., falling on days with mean temperature below 0 °C <sup>a</sup>                                                                                                                                                                                                                        | See above                                                               |
| hi_prec_fr | d yr <sup>-1</sup>  | Frequency of high-precipitation days ( $\geq 5$ times mean daily precipitation) <sup>a</sup>                                                                                                                                                                                                                                          | See above                                                               |
| hi_prec_du | d                   | Mean duration of high-precipitation events (number of consecutive days with $\geq 5$ times mean daily precipitation) <sup>a</sup>                                                                                                                                                                                                     | See above                                                               |
| hi_prec_ti | season <sup>c</sup> | Season during which most high-precipitation days ( $\geq 5$ times mean daily precipitation) occur <sup>a</sup>                                                                                                                                                                                                                        | See above                                                               |
| lo_prec_fr | d yr <sup>-1</sup>  | Frequency of dry days ( $< 1$ mm/d precipitation) <sup>a</sup>                                                                                                                                                                                                                                                                        | See above                                                               |
| lo_prec_du | d                   | Mean duration of dry precipitation events (number of consecutive days with $< 1$ mm/d precipitation) <sup>a</sup>                                                                                                                                                                                                                     | See above                                                               |
| lo_prec_ti | season <sup>c</sup> | Season during which most dry days ( $< 1$ mm/d precipitation) occur <sup>a</sup>                                                                                                                                                                                                                                                      | See above                                                               |

143

144

145

<sup>a</sup> Period 1 October 1990 to 30 September 2019. <sup>b</sup> Period 1970 to 2000. <sup>c</sup> List of abbreviations for seasons: djf – December–January–February, mam – March–April–May, jja – June–July–August, son – September–October–November.

**Table S13. Attributes of land cover provided in the Res-CN.**

| <b>Attribute</b>     | <b>Unit</b>          | <b>Description</b>                                                                                           | <b>Data source</b>                 |
|----------------------|----------------------|--------------------------------------------------------------------------------------------------------------|------------------------------------|
| <b>lai_max</b>       | -                    | Maximum monthly mean of one-sided leaf area index (based on 12-monthly means)                                | MODIS MCD15A3H version 6.1         |
| <b>lai_min</b>       | -                    | Minimum monthly mean of one-sided leaf area index (based on 12-monthly means)                                | See above                          |
| <b>lai_diff</b>      | -                    | Difference between maximum and minimum monthly mean of one-sided leaf area index (based on 12-monthly means) | See above                          |
| <b>ndvi_max</b>      | -                    | Maximum monthly mean of NDVI (based on 12-monthly means)                                                     | MODIS MOD13Q1 version 6.1          |
| <b>ndvi_mean</b>     | -                    | Average monthly mean of NDVI (based on 12-monthly means)                                                     | See above                          |
| <b>EVI</b>           | -                    | Mean enhanced vegetation index                                                                               | See above                          |
| <b>GPP</b>           | kg c m <sup>-2</sup> | Mean gross primary production                                                                                | MODIS MOD17A2H version 6           |
| <b>NPP</b>           | kg c m <sup>-2</sup> | Mean net primary production                                                                                  | MODIS MOD17A3HGF version 6         |
| <b>root_depth_50</b> | m                    | Root depth (percentiles = 50 % extracted from a root depth distribution based on IGBP land cover)            | Eq. (2) and Table 2 in Zeng (2001) |
| <b>root_depth_99</b> | m                    | Root depth (percentiles = 99 % extracted from a root depth distribution based on IGBP land cover)            | See above                          |
| <b>first_type</b>    | -                    | Dominant Land class                                                                                          | ESA WorldCover 10 m                |
| <b>first_frac</b>    | -                    | Fraction of dominant class                                                                                   | See above                          |
| <b>Trees</b>         | -                    | Fraction of "trees" (trees)                                                                                  | See above                          |
| <b>Grassland</b>     | -                    | Fraction of "grassland" (grassland)                                                                          | See above                          |
| <b>Cropland</b>      | -                    | Fraction of "cropland" (cropland)                                                                            | See above                          |
| <b>Shrubland</b>     | -                    | Fraction of "shrubland" (shrubland)                                                                          | See above                          |
| <b>BU</b>            | -                    | Fraction of "built-up" (bu)                                                                                  | See above                          |
| <b>BSV</b>           | -                    | Fraction of "barren sparse vegetation" (bsv)                                                                 | See above                          |
| <b>SI</b>            | -                    | Fraction of "snow and ice" (si)                                                                              | See above                          |
| <b>OC</b>            | -                    | Fraction of "open wate" (oc)                                                                                 | See above                          |
| <b>HW</b>            | -                    | Fraction of "herbaceous wetland" (hw)                                                                        | See above                          |
| <b>Mangroves</b>     | -                    | Fraction of "mangroves" (mangroves)                                                                          | See above                          |
| <b>ML</b>            | -                    | Fraction of "moss and lichen" (ml)                                                                           | See above                          |

**Table S14. Attributes of soil provided in the Res-CN.**

| <b>Attribute</b>            | <b>Unit</b>                       | <b>Description</b>                                            | <b>Data source</b>                                                    |
|-----------------------------|-----------------------------------|---------------------------------------------------------------|-----------------------------------------------------------------------|
| <b>bdod*</b>                | kg dm <sup>-3</sup>               | Bulk density of the fine earth fraction                       | SoilGrids250 m (Hengl et al., 2017) <sup>a</sup>                      |
| <b>cec*</b>                 | cmol kg <sup>-1</sup>             | Cation exchange capacity of the soil                          | See above                                                             |
| <b>soc*</b>                 | g kg <sup>-1</sup>                | Soil organic carbon content in the fine earth fraction        | See above                                                             |
| <b>phh2o*</b>               | 10                                | Soil pH                                                       | See above                                                             |
| <b>pdep</b>                 | cm                                | Soil profile depth                                            | Shangguan et al. (2013)                                               |
| <b>cl</b>                   | %                                 | Percentage of clay content of the soil material               | See above                                                             |
| <b>sa</b>                   | %                                 | Percentage of sand content of the soil material               | See above                                                             |
| <b>por</b>                  | cm <sup>3</sup> cm <sup>-3</sup>  | Porosity                                                      | See above                                                             |
| <b>si</b>                   | %                                 | Percentage of silt content of the soil material               | See above                                                             |
| <b>grav</b>                 | %                                 | Rock fragment content                                         | See above                                                             |
| <b>som</b>                  | %                                 | Soil organic carbon content                                   | See above                                                             |
| <b>log_k_s*</b>             | cm d <sup>-1</sup>                | Log-10 transformation of saturated hydraulic conductivity     | Soil hydraulic and thermal parameters (Dai et al., 2019) <sup>a</sup> |
| <b>theta_s*</b>             | cm <sup>3</sup> cm <sup>-3</sup>  | Saturated water content                                       | See above                                                             |
| <b>tkstatu*</b>             | W m <sup>-1</sup> K <sup>-1</sup> | Thermal conductivity of unfrozen saturated soils              | See above                                                             |
| <b>csol*</b>                | J/(m <sup>3</sup> K)              | Volumetric heat capacity of soil solids in a unit soil volume | See above                                                             |
| <b>lambda*</b>              | -                                 | Pore size distribution index for the Campbell model           | See above                                                             |
| <b>log_vgm_n*</b>           | -                                 | Log-10 transformation of a shape parameter for the VG model   | See above                                                             |
| <b>psi_s*</b>               | cm                                | Saturated suction for the Campbell model                      | See above                                                             |
| <b>tkdry*</b>               | W m <sup>-1</sup> K <sup>-1</sup> | Thermal conductivity of dry soils                             | See above                                                             |
| <b>tkstatf*</b>             | W m <sup>-1</sup> K <sup>-1</sup> | Thermal conductivity of frozen saturated soils                | See above                                                             |
| <b>vf_clay_s*</b>           | cm <sup>3</sup> cm <sup>-3</sup>  | Volumetric fraction of clay                                   | See above                                                             |
| <b>vf_gravels_s*</b>        | cm <sup>3</sup> cm <sup>-3</sup>  | Volumetric fraction of gravel                                 | See above                                                             |
| <b>vf_om_s*</b>             | cm <sup>3</sup> cm <sup>-3</sup>  | Volumetric fraction of SOM                                    | See above                                                             |
| <b>vf_quartz_mineral_s*</b> | cm <sup>3</sup> cm <sup>-3</sup>  | Volumetric fraction of quartz within mineral soils            | See above                                                             |
| <b>vf_sand_s*</b>           | cm <sup>3</sup> cm <sup>-3</sup>  | Volumetric fraction of sand                                   | See above                                                             |
| <b>vf_silt_s*</b>           | cm <sup>3</sup> cm <sup>-3</sup>  | Volumetric fraction of silt                                   | See above                                                             |
| <b>vgm_alpha*</b>           | cm <sup>-1</sup>                  | The inverse of the air-entry value for the VG model           | See above                                                             |
| <b>vgm_theta_r*</b>         | cm <sup>3</sup> cm <sup>-3</sup>  | Residual moisture content for the VG model                    | See above                                                             |

149 \* Within the aforementioned 28 soil variables, 21 variables marked with \* are represented across 7 levels encompassing six soil  
150 layers as well as the entire soil layer. An instance of this is the cation exchange capacity (CEC) of the soil, which has 7 associated  
151 attributes denoted as cec\_1, cec\_2, ..., cec\_6, and cec, indicating the CEC of the first to sixth soil layers and the entire soil layer, i.e.,  
152 at six layers of 0–0.05, 0.05–0.15, 0.15–0.30, 0.30–0.60, 0.60–1.00, and 1.00–2.00m, as well as the whole soil layer. In this sense,  
153 we provided 154 soil attributes.  
154



**Table S15. Attributes of geology provided in the Res-CN.**

| <b>Attribute</b>    | <b>Unit</b>    | <b>Description</b>                                 | <b>Data source</b>                 |
|---------------------|----------------|----------------------------------------------------|------------------------------------|
| <b>permeability</b> | m <sup>2</sup> | Subsurface porosity                                | GLHYMPS (Gleeson, 2018)            |
| <b>porosity</b>     | -              | Subsurface permeability (log-10)                   | See above                          |
| <b>first_type</b>   | -              | Dominant geological class                          | GLiM (Hartmann and Moosdorf, 2012) |
| <b>first_frac</b>   | %              | Fraction of “first_type”                           | See above                          |
| <b>ig</b>           | %              | Fraction of “ice and glacier” (ig)                 | See above                          |
| <b>mt</b>           | %              | Fraction of “metamorphic” (mt)                     | See above                          |
| <b>pa</b>           | %              | Fraction of “acid plutonic rocks” (pa)             | See above                          |
| <b>pb</b>           | %              | Fraction of “basic plutonic rocks” (pb)            | See above                          |
| <b>pi</b>           | %              | Fraction of “intermediate plutonic rocks” (pi)     | See above                          |
| <b>py</b>           | %              | Fraction of “pyroclastics” (py)                    | See above                          |
| <b>sc</b>           | %              | Fraction of “carbonate sedimentary rocks” (sc)     | See above                          |
| <b>sm</b>           | %              | Fraction of “mixed sedimentary rocks” (sm)         | See above                          |
| <b>ss</b>           | %              | Fraction of “siliciclastic sedimentary rocks” (ss) | See above                          |
| <b>su</b>           | %              | Fraction of “unconsolidated sediments” (su)        | See above                          |
| <b>va</b>           | %              | Fraction of “acid volcanic rocks” (va)             | See above                          |
| <b>vb</b>           | %              | Fraction of “basic volcanic rocks” (vb)            | See above                          |
| <b>vi</b>           | %              | Fraction of “intermediate volcanic rocks” (vi)     | See above                          |
| <b>nd</b>           | %              | Fraction of “no data” (nd)                         | See above                          |
| <b>wb</b>           | %              | Fraction of “water bodies” (wb)                    | See above                          |

**Table S16. Attributes of anthropogenic activity provided in the Res-CN.**

| <b>Attribute</b>                        | <b>Unit</b>           | <b>Description</b>                                                                                                                                                                                                                                                                                                                                                                                                                                                        | <b>Data source</b>                                                  |
|-----------------------------------------|-----------------------|---------------------------------------------------------------------------------------------------------------------------------------------------------------------------------------------------------------------------------------------------------------------------------------------------------------------------------------------------------------------------------------------------------------------------------------------------------------------------|---------------------------------------------------------------------|
| <b>population*</b>                      | -                     | Population for the years 2000, 2005, 2010, 2015, and 2020                                                                                                                                                                                                                                                                                                                                                                                                                 | Gridded Population of the World (GPW) database v4.11                |
| <b>avg_vis*</b>                         | -                     | The average of the visible band digital number values with no further filtering                                                                                                                                                                                                                                                                                                                                                                                           | DMSP-OLS Nighttime Lights v4 dataset (Doll, 2008)                   |
| <b>stable_lights*</b>                   | -                     | The cleaned up avg_vis contains the lights from cities, towns, and other sites with persistent lighting, including gas flares. Ephemeral events, such as fires, have been discarded. The background noise was identified and replaced with values of zero                                                                                                                                                                                                                 | See above                                                           |
| <b>cf_cvg*</b>                          | -                     | Cloud-free coverages tally the total number of observations that went into each 30-arc second grid cell. This band can be used to identify areas with low numbers of observations where the quality is reduced.                                                                                                                                                                                                                                                           | See above                                                           |
| <b>avg_lights_x_pct*</b>                | -                     | The average visible band digital number (DN) of cloud-free light detections multiplied by the percent frequency of light detection. The inclusion of the percent frequency of detection term normalizes the resulting digital values for variations in the persistence of lighting. For instance, the value for a light only detected half the time is discounted by 50%. Note that this product contains detections from fires and a variable amount of background noise | See above                                                           |
| <b>reproject_grip4_total_dens_m_km2</b> | m<br>km <sup>-2</sup> | Road density                                                                                                                                                                                                                                                                                                                                                                                                                                                              | Global Roads Inventory Project (GRIP) dataset (Meijer et al., 2018) |
| <b>reproject_hfp2009</b>                | -                     | The Human Footprint camp of cumulative pressures on the environment in 2009                                                                                                                                                                                                                                                                                                                                                                                               | Global Human Footprint v2 dataset (Venter et al., 2016)             |
| <b>reproject_hfp1993</b>                | -                     | The Human Footprint camp of cumulative pressures on the environment in 1993                                                                                                                                                                                                                                                                                                                                                                                               | Global Human Footprint v2 dataset (Venter et al., 2016)             |

158 \* Within the population category, there are five included attributes, i.e., population\_2000, population\_2005, population\_2010,  
159 population\_2015, and population\_2020. As for the Nighttime light category, which comprises of avg\_vis, stable\_lights, cf\_cvg, and  
160 avg\_lights\_x\_pct, both the mean and sum values for each variable are provided for all available time frames. To illustrate, the  
161 variable mean\_cf\_cvg\_101994 denotes the mean value of cf\_cvg for the month of October in 1994. Accordingly, a total of 288  
162 anthropogenic attributes have been provided.  
163

164 **Texts**

165 **Text S1**

166 The following steps details the procedures for automatically delineating reservoir upstream catchments.

- 167 1. Using the MERIT Hydro flow directions and GeoDAR dam locations to drive the outlet relocation algorithm,  
168 resulting the raw full catchment of each reservoir (using the watershed .exe).
- 169 2. Clearing the holes to remove topology errors across full catchments using QGIS 3.24.
- 170 3. Checking all full catchments and removing/modifying unrealistic or incorrectly catchments. Most of these  
171 incorrectly catchments are assigned to small reservoirs located near the confluences of rivers of different  
172 sizes. See the example below where the reservoir “2844” is assigned to a large catchment of the mainstream  
173 (dark) rather than a small catchment of the tributary. We remove these small reservoirs that are assigned  
174 by a large catchment considering three aspects. Firstly, these reservoirs are relatively small, with a median  
175 size of 0.06 km<sup>2</sup> and 63% of them are smaller than 0.01 km<sup>2</sup>. Secondly, the reservoirs have little regulation  
176 impacts and are typically removed from the literature (see CAMELS datasets). Thirdly, no rivers intersect  
177 the reservoirs, even the latest small rivers provided by Merit-Hydro, which means that the delineated  
178 catchment area is extremely small.
- 179 4. Generating intermediate catchments by removing the overlapping areas of upstream reservoirs from the  
180 full catchment of the current reservoir using QGIS 3.24.
- 181 5. Fixing the invalid geometry of intermediate catchments by eliminating geometry errors.

182 Based on the literature, and our discussion – cross validation (See main text Section 3.2), verifying the reliability of  
183 our delineated catchments.

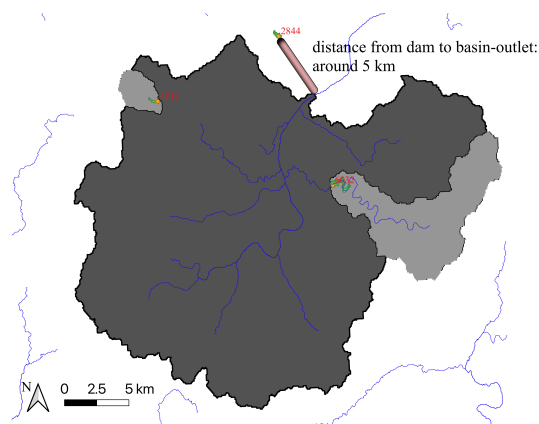

184

185

**Example.**
